# Supplementary material for: Cultures of Human Skin Mast Cells, an Attractive In Vitro Model for Studies of Human Mast Cell Biology
Source: MDPI journal article supplement (doi:10.3390/cells13010098), 2024-01-02
Supplement: s1 [file s1]

## Supplementary Tables

**Table S1.** Transcript levels in reads from an Ampliseq analysis of freshly isolated MCs from foreskin and from purified MCs from breast skin and foreskin MCs cultured for 2-3 weeks for proteoglycans and other carbohydrate related functions.

|                                                        | Freshly isolated cells |      |      | Cells cultured for 2-3 weeks |      |                         |      |
|--------------------------------------------------------|------------------------|------|------|------------------------------|------|-------------------------|------|
|                                                        | Foreskin<br>(Male)     |      |      | Foreskin<br>(Male)           |      | Breast skin<br>(Female) |      |
| Proteoglycans and other carbohydrate related functions |                        |      |      |                              |      |                         |      |
| SRGN                                                   | 5850                   | 7939 | 8529 | 4557                         | 3642 | 3982                    | 3936 |
| HS3ST1                                                 | 46                     | 19   | 54   | 253                          | 292  | 91                      | 367  |
| HS6ST1                                                 | 293                    | 108  | 202  | 346                          | 419  | 292                     | 478  |
| HSPG2                                                  | 198                    | 127  | 55   | 88                           | 84   | 70                      | 82   |
| GALNT6                                                 | 59                     | 68   | 50   | 57                           | 76   | 63                      | 60   |
| CHST15                                                 | 10                     | 11   | 1    | 29                           | 61   | 30                      | 16   |
| RENBP                                                  | 99                     | 63   | 82   | 127                          | 129  | 138                     | 176  |
| GBE1                                                   | 139                    | 151  | 199  | 208                          | 191  | 161                     | 156  |
| GNS                                                    | 135                    | 270  | 217  | 394                          | 391  | 296                     | 332  |
|                                                        |                        |      |      |                              |      |                         |      |
| SDC3                                                   | 87                     | 74   | 44   | 103                          | 94   | 157                     | 97   |
| B3GNT5                                                 | 79                     | 100  | 152  | 40                           | 44   | 18                      | 29   |
| B4GALT5                                                | 129                    | 255  | 321  | 48                           | 47   | 43                      | 45   |
| PRG2                                                   | 13                     | 29   | 15   | 165                          | 204  | 126                     | 77   |
| NDST1                                                  | 65                     | 54   | 33   | 85                           | 113  | 112                     | 108  |
| EXT1                                                   | 119                    | 91   | 87   | 147                          | 165  | 168                     | 177  |
| EXTL3                                                  | 65                     | 25   | 37   | 58                           | 76   | 65                      | 83   |
| ST8SIA1                                                | 33                     | 14   | 31   | 78                           | 61   | 49                      | 67   |
| GNPTAB                                                 | 168                    | 83   | 68   | 358                          | 334  | 297                     | 383  |
| LGALS3                                                 | 679                    | 885  | 830  | 396                          | 410  | 484                     | 487  |
| GM2A                                                   | 616                    | 367  | 631  | 898                          | 1162 | 924                     | 1297 |

**Table S2.** Transcript levels in reads from an Ampliseq analysis of freshly isolated MCs from foreskin and from purified MCs from breast skin and foreskin MCs cultured for 2-3 weeks for solute carriers.

|                 | Freshly isolated cells |     |      | Cells cultured for 2-3 weeks |      |                         |      |
|-----------------|------------------------|-----|------|------------------------------|------|-------------------------|------|
|                 | Foreskin<br>(Male)     |     |      | Foreskin<br>(Male)           |      | Breast skin<br>(Female) |      |
| Solute Carriers |                        |     |      |                              |      |                         |      |
| SLC1A5          | 344                    | 376 | 409  | 142                          | 149  | 162                     | 118  |
| SLC6A8          | 30                     | 72  | 77   | 1                            | 0.3  | 0.5                     | 2    |
| SLC7A8          | 2                      | 2   | 2    | 118                          | 144  | 190                     | 151  |
| SLC8A3          | 47                     | 10  | 29   | 89                           | 85   | 98                      | 102  |
| SLC9A1          | 210                    | 150 | 208  | 120                          | 113  | 118                     | 128  |
| SLC16A3         | 52                     | 181 | 131  | 173                          | 165  | 210                     | 162  |
| SLC18A2         | 698                    | 702 | 1733 | 1818                         | 1662 | 1044                    | 1819 |
| SLC22A17        | 8                      | 8   | 2    | 83                           | 126  | 249                     | 120  |
| SLC24A3         | 71                     | 35  | 59   | 100                          | 105  | 123                     | 104  |
| SLC25A44        | 467                    | 189 | 415  | 33                           | 47   | 40                      | 38   |
| SLC29A1         | 102                    | 70  | 73   | 97                           | 91   | 95                      | 66   |
| SLC30A1         | 57                     | 50  | 42   | 146                          | 212  | 310                     | 298  |
| SLC40A1         | 68                     | 58  | 129  | 17                           | 15   | 41                      | 78   |
| SLC43A3         | 352                    | 387 | 355  | 359                          | 368  | 336                     | 328  |

|                                                                           |     |     |     |      |      |      |      |
|---------------------------------------------------------------------------|-----|-----|-----|------|------|------|------|
| SLC44A1                                                                   | 118 | 203 | 137 | 235  | 228  | 248  | 213  |
| SLC45A3                                                                   | 200 | 70  | 213 | 267  | 304  | 240  | 250  |
| SLCO2B1                                                                   | 154 | 164 | 205 | 203  | 250  | 159  | 191  |
| SLCO3A1                                                                   | 37  | 32  | 30  | 36   | 41   | 48   | 44   |
| SLCO4A1                                                                   | 52  | 85  | 50  | 0.3  | 0.2  | 0.2  | 0.1  |
| <b>Lipid transporters and their receptors and lipid metabolic enzymes</b> |     |     |     |      |      |      |      |
| APOE                                                                      | 58  | 53  | 50  | 0.9  | 3    | 1    | 0.6  |
| FADS2                                                                     | 105 | 119 | 132 | 1276 | 1735 | 1227 | 1169 |
| LRP4                                                                      | 148 | 131 | 165 | 56   | 54   | 46   | 93   |
| <b>S100 proteins</b>                                                      |     |     |     |      |      |      |      |
| S100A11                                                                   | 322 | 749 | 356 | 647  | 682  | 644  | 692  |

**Table S3.** Transcript levels in reads from an Ampliseq analysis of freshly isolated MCs from foreskin and from purified MCs from breast skin and foreskin MCs cultured for 2-3 weeks for calcium, sodium and potassium channels-transporters and other cell surface proteins.

|                                                     | Freshly isolated cells |     |     | Cells cultured for 2-3 weeks |     |                         |     |
|-----------------------------------------------------|------------------------|-----|-----|------------------------------|-----|-------------------------|-----|
|                                                     | Foreskin<br>(Male)     |     |     | Foreskin<br>(Male)           |     | Breast skin<br>(Female) |     |
| Calcium, Sodium and Potassium channels-transporters |                        |     |     |                              |     |                         |     |
| CACNA2D2                                            | 84                     | 59  | 97  | 29                           | 49  | 121                     | 99  |
| ATP1B1                                              | 204                    | 187 | 257 | 81                           | 64  | 30                      | 76  |
| Other Cell Surface proteins                         |                        |     |     |                              |     |                         |     |
| GPNUMB                                              | 543                    | 467 | 715 | 478                          | 532 | 112                     | 338 |
| TMEM246                                             | 70                     | 102 | 99  | 135                          | 174 | 110                     | 102 |
| EMP1                                                | 333                    | 517 | 137 | 3                            | 0.5 | 1                       | 2   |
| DCBLD2                                              | 78                     | 36  | 83  | 371                          | 335 | 452                     | 541 |
| TJP2                                                | 60                     | 110 | 50  | 40                           | 42  | 30                      | 4   |
| MPP1                                                | 211                    | 203 | 126 | 316                          | 308 | 303                     | 242 |
| NEO1                                                | 49                     | 48  | 43  | 13                           | 13  | 8                       | 11  |
| ITM2A                                               | 93                     | 135 | 64  | 40                           | 45  | 79                      | 89  |
| KCTD20                                              | 82                     | 166 | 150 | 196                          | 151 | 128                     | 154 |
| EPB41L1                                             | 176                    | 98  | 93  | 390                          | 339 | 293                     | 323 |
| SEMA7A                                              | 164                    | 100 | 203 | 335                          | 460 | 699                     | 460 |

**Table S4.** Transcript levels in reads from an Ampliseq analysis of freshly isolated MCs from foreskin and from purified MCs from breast skin and foreskin MCs cultured for 2-3 weeks for Siglecs.

|         | Freshly isolated cells |     |     | Cells cultured for 2-3 weeks |      |                         |      |
|---------|------------------------|-----|-----|------------------------------|------|-------------------------|------|
|         | Foreskin<br>(Male)     |     |     | Foreskin<br>(Male)           |      | Breast skin<br>(Female) |      |
| Siglecs |                        |     |     |                              |      |                         |      |
| SIGLEC6 | 484                    | 289 | 515 | 1281                         | 1436 | 1361                    | 1490 |
| SIGLEC8 | 129                    | 33  | 108 | 130                          | 198  | 181                     | 243  |
| SIGLEC5 | 16                     | 10  | 21  | 19                           | 26   | 11                      | 46   |
| SIGLEC9 | 19                     | 25  | 37  | 41                           | 50   | 91                      | 44   |

**Table S5.** Transcript levels in reads from an Ampliseq analysis of freshly isolated MCs from foreskin and from purified MCs from breast skin and foreskin MCs cultured for 2-3 weeks for olfactory and other receptors.

|                     | Freshly isolated cells |    |    | Cells cultured for 2-3 weeks |    |                         |    |
|---------------------|------------------------|----|----|------------------------------|----|-------------------------|----|
|                     | Foreskin<br>(Male)     |    |    | Foreskin<br>(Male)           |    | Breast skin<br>(Female) |    |
| Olfactory receptors |                        |    |    |                              |    |                         |    |
| OR2A4               | 18                     | 17 | 19 | 94                           | 67 | 93                      | 47 |

|                        |     |     |     |     |     |     |     |
|------------------------|-----|-----|-----|-----|-----|-----|-----|
| OR2A7                  | 7   | 5   | 12  | 28  | 25  | 33  | 23  |
| OR2G3                  | 3   | 7   | 4   | 11  | 20  | 6   | 10  |
| OR2G2                  | 3   | 7   | 5   | 6   | 8   | 3   | 2   |
| <b>Other Receptors</b> |     |     |     |     |     |     |     |
| LRP4                   | 148 | 131 | 165 | 56  | 54  | 46  | 93  |
| STAB1                  | 22  | 14  | 17  | 24  | 28  | 41  | 46  |
| GPR141                 | 80  | 79  | 127 | 53  | 69  | 91  | 67  |
| FZD1                   | 28  | 24  | 25  | 59  | 49  | 45  | 83  |
| FZD5                   | 46  | 30  | 51  | 3   | 4   | 1   | 3   |
| SCARF1                 | 22  | 21  | 27  | 20  | 22  | 32  | 20  |
| GPR183                 | 250 | 216 | 167 | 2   | 0   | 3   | 3   |
| LDLR                   | 263 | 535 | 152 | 226 | 285 | 179 | 216 |
| VDR                    | 10  | 22  | 19  | 77  | 109 | 115 | 105 |
| KLRG1                  | 202 | 96  | 241 | 422 | 368 | 368 | 366 |
| TSPAN4                 | 86  | 69  | 71  | 90  | 93  | 106 | 156 |
| DRD2                   | 35  | 19  | 56  | 71  | 57  | 94  | 47  |
| CNRIP1                 | 113 | 74  | 81  | 241 | 224 | 382 | 124 |
| AMHR2                  | 59  | 256 | 57  | 86  | 104 | 85  | 101 |
| ADORA3                 | 16  | 3   | 5   | 14  | 20  | 10  | 12  |

**Table S6.** Transcript levels in reads from an Ampliseq analysis of freshly isolated MCs from foreskin and from purified MCs from breast skin and foreskin MCs cultured for 2-3 weeks for cell signaling components.

|                           | Freshly isolated cells |      |      | Cells cultured for 2-3 weeks |      |                         |      |
|---------------------------|------------------------|------|------|------------------------------|------|-------------------------|------|
|                           | Foreskin<br>(Male)     |      |      | Foreskin<br>(Male)           |      | Breast skin<br>(Female) |      |
| Cell Signaling components |                        |      |      |                              |      |                         |      |
| ARHGAP18                  | 299                    | 345  | 402  | 621                          | 532  | 521                     | 617  |
| RGS13                     | 281                    | 181  | 339  | 354                          | 252  | 352                     | 435  |
| AGAP1                     | 226                    | 200  | 244  | 256                          | 288  | 334                     | 280  |
| BTK                       | 155                    | 66   | 125  | 469                          | 352  | 436                     | 426  |
| LAT                       | 290                    | 352  | 371  | 413                          | 490  | 380                     | 513  |
|                           |                        |      |      |                              |      |                         |      |
| GCSAML                    | 468                    | 663  | 589  | 1268                         | 1019 | 926                     | 1231 |
| DUSP1                     | 11964                  | 2666 | 4799 | 15                           | 14   | 26                      | 18   |
| DUSP3                     | 132                    | 143  | 189  | 32                           | 35   | 27                      | 43   |
| DUSP4                     | 146                    | 488  | 96   | 318                          | 327  | 460                     | 449  |
| DUSP6                     | 728                    | 951  | 624  | 346                          | 362  | 451                     | 390  |
| DUSP7                     | 254                    | 137  | 247  | 75                           | 104  | 87                      | 92   |
| DUSP14                    | 130                    | 433  | 229  | 99                           | 86   | 123                     | 143  |
| DUSP23                    | 52                     | 36   | 44   | 111                          | 132  | 112                     | 121  |
| LCP2                      | 427                    | 252  | 303  | 730                          | 775  | 972                     | 919  |
| PPM1H                     | 118                    | 37   | 53   | 131                          | 156  | 132                     | 135  |
| RASGRP4                   | 118                    | 48   | 126  | 238                          | 281  | 297                     | 283  |
| ARHGEF40                  | 104                    | 91   | 100  | 72                           | 93   | 61                      | 79   |
| GNAI1                     | 98                     | 28   | 22   | 136                          | 147  | 153                     | 147  |
| PIK3R3                    | 43                     | 40   | 31   | 35                           | 86   | 48                      | 72   |
| MAPK12                    | 42                     | 22   | 36   | 30                           | 45   | 47                      | 64   |
| RAB32                     | 40                     | 38   | 46   | 93                           | 82   | 72                      | 81   |
| RAB34                     | 60                     | 54   | 45   | 55                           | 57   | 64                      | 51   |
| RAB27B                    | 277                    | 87   | 143  | 587                          | 654  | 679                     | 712  |
| RIN2                      | 54                     | 45   | 46   | 4                            | 2    | 3                       | 3    |
| TIAM1                     | 123                    | 98   | 135  | 268                          | 344  | 480                     | 510  |

|          |     |     |     |      |      |      |      |
|----------|-----|-----|-----|------|------|------|------|
| ARHGAP6  | 28  | 27  | 27  | 149  | 148  | 201  | 148  |
| ARHGAP18 | 299 | 345 | 402 | 61   | 532  | 521  | 617  |
| PLK1     | 2   | 1   | 1   | 117  | 95   | 60   | 52   |
| PDE3A    | 44  | 17  | 34  | 29   | 46   | 61   | 58   |
| ITK      | 78  | 395 | 128 | 48   | 46   | 31   | 29   |
| TIE1     | 27  | 28  | 13  | 50   | 42   | 35   | 33   |
| RUSC2    | 40  | 48  | 32  | 43   | 48   | 48   | 49   |
| PPM1H    | 118 | 37  | 53  | 131  | 156  | 132  | 135  |
| GMPR     | 88  | 52  | 73  | 503  | 381  | 516  | 410  |
| LPCAT2   | 202 | 95  | 103 | 146  | 185  | 166  | 156  |
| CDK15    | 192 | 53  | 106 | 122  | 127  | 112  | 118  |
| EVPL     | 327 | 168 | 472 | 55   | 55   | 54   | 75   |
| SOX13    | 105 | 144 | 135 | 77   | 86   | 112  | 97   |
| GNAQ     | 127 | 108 | 108 | 134  | 141  | 163  | 164  |
| DAPK1    | 75  | 121 | 111 | 137  | 140  | 148  | 116  |
| FHL3     | 42  | 41  | 53  | 24   | 32   | 15   | 14   |
| NDRG2    | 191 | 158 | 230 | 98   | 116  | 97   | 103  |
| FSCN1    | 211 | 230 | 268 | 72   | 123  | 30   | 52   |
| TYROBP   | 735 | 543 | 949 | 1360 | 1464 | 1229 | 1936 |
| TNIK     | 261 | 278 | 384 | 258  | 278  | 220  | 275  |
| NREP     | 60  | 45  | 64  | 63   | 67   | 89   | 53   |
| SDCBP    | 278 | 240 | 91  | 270  | 267  | 262  | 235  |
| ALS2     | 145 | 80  | 164 | 195  | 197  | 192  | 153  |
| TESPA1   | 528 | 272 | 558 | 1428 | 1632 | 1600 | 1717 |
| DLC1     | 690 | 419 | 998 | 597  | 546  | 560  | 542  |
| LAX1     | 207 | 172 | 206 | 292  | 296  | 323  | 287  |
| CALB2    | 98  | 295 | 125 | 320  | 450  | 301  | 351  |
| NCS1     | 31  | 185 | 35  | 61   | 51   | 48   | 63   |
| MLPH     | 200 | 152 | 307 | 161  | 177  | 153  | 205  |

**Table S7.** Transcript levels in reads from an Ampliseq analysis of freshly isolated MCs from foreskin and from purified MCs from breast skin and foreskin MCs cultured for 2-3 weeks for other enzymes.

|               | Freshly isolated cells |     |     | Cells cultured for 2-3 weeks |     |                         |     |
|---------------|------------------------|-----|-----|------------------------------|-----|-------------------------|-----|
|               | Foreskin<br>(Male)     |     |     | Foreskin<br>(Male)           |     | Breast skin<br>(Female) |     |
| Other enzymes |                        |     |     |                              |     |                         |     |
| MAOA          | 9                      | 10  | 0.7 | 765                          | 721 | 924                     | 848 |
| MAOB          | 200                    | 105 | 124 | 557                          | 523 | 531                     | 462 |
| ZNRF1         | 102                    | 55  | 79  | 165                          | 153 | 179                     | 157 |
| NDFIP2        | 118                    | 108 | 103 | 438                          | 393 | 487                     | 391 |
| AGPAT9        | 213                    | 335 | 338 | 142                          | 112 | 152                     | 99  |
| BLVRA         | 77                     | 31  | 15  | 236                          | 280 | 226                     | 262 |
| PADI2         | 59                     | 47  | 66  | 60                           | 103 | 68                      | 119 |
| PADI4         | 0                      | 0   | 0   | 0.5                          | 0.2 | 0.4                     | 0.6 |
| INPP1         | 35                     | 39  | 20  | 33                           | 24  | 34                      | 26  |
| CHN2          | 64                     | 86  | 40  | 51                           | 45  | 56                      | 48  |
| FADS1         | 25                     | 14  | 6   | 254                          | 360 | 230                     | 207 |
| DCAF12        | 55                     | 83  | 79  | 92                           | 107 | 104                     | 103 |
| ANKRD9        | 96                     | 109 | 185 | 44                           | 20  | 37                      | 20  |
| ENPP2         | 107                    | 86  | 57  | 25                           | 22  | 24                      | 53  |
| MAT2A         | 254                    | 142 | 217 | 101                          | 164 | 173                     | 133 |
| ALAS1         | 155                    | 90  | 202 | 561                          | 785 | 813                     | 864 |

|         |      |      |      |      |      |      |      |
|---------|------|------|------|------|------|------|------|
| MBOAT7  | 291  | 324  | 541  | 376  | 438  | 337  | 482  |
| GLUL    | 2816 | 5447 | 2432 | 3182 | 3873 | 3049 | 3208 |
| TRIM63  | 146  | 162  | 60   | 143  | 120  | 57   | 87   |
| ALDH1A1 | 100  | 50   | 33   | 448  | 359  | 316  | 584  |
| TYMS    | 4    | 7    | 10   | 713  | 477  | 553  | 321  |

**Table S8.** Transcript levels in reads from an Ampliseq analysis of freshly isolated MCs from foreskin and from purified MCs from breast skin and foreskin MCs cultured for 2-3 weeks for components of vesicle transport.

|                   | Freshly isolated cells |     |     | Cells cultured for 2-3 weeks |     |                         |     |
|-------------------|------------------------|-----|-----|------------------------------|-----|-------------------------|-----|
|                   | Foreskin<br>(Male)     |     |     | Foreskin<br>(Male)           |     | Breast skin<br>(Female) |     |
| Vesicle transport |                        |     |     |                              |     |                         |     |
| STX3              | 149                    | 47  | 100 | 259                          | 298 | 267                     | 324 |
| STX11             | 196                    | 327 | 268 | 69                           | 68  | 60                      | 68  |
| DYNLL1            | 457                    | 756 | 669 | 600                          | 764 | 666                     | 765 |

**Table S9.** Transcript levels in reads from an Ampliseq analysis of freshly isolated MCs from foreskin and from purified MCs from breast skin and foreskin MCs cultured for 2-3 weeks for cytoskeletal, nuclear, enamel and angiogenesis related proteins.

|                                          | Freshly isolated cells |      |      | Cells cultured for 2-3 weeks |      |                         |      |
|------------------------------------------|------------------------|------|------|------------------------------|------|-------------------------|------|
|                                          | Foreskin<br>(Male)     |      |      | Foreskin<br>(Male)           |      | Breast skin<br>(Female) |      |
| Cytoskeleton                             |                        |      |      |                              |      |                         |      |
| KRT19                                    | 162                    | 160  | 174  | 167                          | 215  | 246                     | 190  |
| SHROOM1                                  | 40                     | 21   | 28   | 20                           | 35   | 47                      | 50   |
| MYO10                                    | 85                     | 110  | 136  | 98                           | 110  | 123                     | 146  |
| TUBB3                                    | 18                     | 49   | 38   | 216                          | 313  | 253                     | 217  |
| TPPP3                                    | 95                     | 179  | 120  | 0                            | 0    | 0.1                     | 0.1  |
| DBN1                                     | 66                     | 65   | 31   | 4                            | 2    | 6                       | 13   |
| PDLIM7                                   | 124                    | 179  | 61   | 47                           | 64   | 50                      | 42   |
| GSN                                      | 205                    | 198  | 39   | 104                          | 149  | 198                     | 124  |
| TNS1                                     | 848                    | 683  | 567  | 361                          | 444  | 468                     | 364  |
| CAPG                                     | 507                    | 567  | 727  | 1880                         | 2312 | 1969                    | 2168 |
| CTTNBP2                                  | 138                    | 116  | 106  | 367                          | 467  | 467                     | 494  |
| SPTB                                     | 82                     | 45   | 89   | 33                           | 42   | 48                      | 26   |
| Nuclear located proteins                 |                        |      |      |                              |      |                         |      |
| SLFN5                                    | 208                    | 65   | 129  | 236                          | 241  | 195                     | 325  |
| LMNA                                     | 4302                   | 6983 | 5755 | 462                          | 496  | 503                     | 467  |
| Enamel formation                         |                        |      |      |                              |      |                         |      |
| TUFT1                                    | 47                     | 67   | 71   | 2                            | 4    | 2                       | 4    |
| Angiogenesis promoting and eNOS activity |                        |      |      |                              |      |                         |      |
| ENG                                      | 113                    | 178  | 83   | 5                            | 4    | 6                       | 7    |
| SDPR                                     | 290                    | 49   | 48   | 510                          | 466  | 525                     | 540  |

**Table S10.** Transcript levels in reads from an Ampliseq analysis of freshly isolated MCs from foreskin and from purified MCs from breast skin and foreskin MCs cultured for 2-3 weeks for nuclear proteins.

|                  | Freshly isolated cells |     |     | Cells cultured for 2-3 weeks |     |                         |     |
|------------------|------------------------|-----|-----|------------------------------|-----|-------------------------|-----|
|                  | Foreskin<br>(Male)     |     |     | Foreskin<br>(Male)           |     | Breast skin<br>(Female) |     |
| Nuclear proteins |                        |     |     |                              |     |                         |     |
| PHLDA1           | 154                    | 220 | 28  | 82                           | 89  | 143                     | 62  |
| AHNAK2           | 139                    | 75  | 120 | 119                          | 164 | 91                      | 104 |

**Table S11.** Transcript levels in reads from an Ampliseq analysis of freshly isolated MCs from foreskin and from purified MCs from breast skin and foreskin MCs cultured for 2-3 weeks for extracellular matrix, oncogenes, endogenous retroviral and proteins of unknown function.

|                              | Freshly isolated cells |     |      | Cells cultured for 2-3 weeks |      |                         |      |
|------------------------------|------------------------|-----|------|------------------------------|------|-------------------------|------|
|                              | Foreskin<br>(Male)     |     |      | Foreskin<br>(Male)           |      | Breast skin<br>(Female) |      |
| Extracellular matrix         |                        |     |      |                              |      |                         |      |
| COL13A1                      | 72                     | 34  | 63   | 104                          | 101  | 91                      | 165  |
| COL18A1                      | 114                    | 198 | 145  | 95                           | 86   | 78                      | 74   |
| FREM1                        | 34                     | 14  | 36   | 36                           | 54   | 43                      | 34   |
| FERMT2                       | 92                     | 103 | 31   | 72                           | 66   | 66                      | 53   |
| EMILIN2                      | 700                    | 750 | 1159 | 147                          | 161  | 161                     | 269  |
| Oncogenes                    |                        |     |      |                              |      |                         |      |
| DLC1                         | 690                    | 419 | 998  | 597                          | 546  | 560                     | 542  |
| FES                          | 60                     | 56  | 48   | 90                           | 115  | 118                     | 148  |
| ETS2                         | 395                    | 965 | 394  | 32                           | 42   | 31                      | 30   |
| Endogenous Retrovirus        |                        |     |      |                              |      |                         |      |
| ERVFRD-1                     | 174                    | 85  | 156  | 118                          | 189  | 229                     | 296  |
| Proteins of unknown function |                        |     |      |                              |      |                         |      |
| FAM46A                       | 311                    | 168 | 668  | 137                          | 81   | 131                     | 181  |
| FAM129B                      | 520                    | 403 | 739  | 544                          | 598  | 501                     | 634  |
| OAF                          | 209                    | 176 | 310  | 110                          | 122  | 64                      | 138  |
| VWA5A                        | 1440                   | 941 | 2052 | 1954                         | 1981 | 2054                    | 2531 |
| TMEM246                      | 70                     | 102 | 99   | 135                          | 174  | 110                     | 102  |
| NAV1                         | 128                    | 44  | 64   | 96                           | 134  | 167                     | 106  |
